# Supplementary material
Source: publisher figshare collection journal article supplement (https://karger.figshare.com/ndownloader/files/30807106)
Supplement: Supplementary file 1 [file 30807106]

Table 3S: Excluded studies

| **Study** | **Reason for exclusion** |
| --- | --- |
| Ameer 2011 [[1](#_ENREF_1)] | Wrong study type (retrospective study) |
| Bessede 2017 [[2](#_ENREF_2)] | Wrong intervention |
| Englesbe 2007 [[3](#_ENREF_3)] | Wrong study type (retrospective study) |
| Gutierrez Banos 1994a [[4](#_ENREF_4)] | No control group |
| Gutierrez Banos 1994b [[5](#_ENREF_5)] | Wrong intervention |
| Hakim 1994 [[6](#_ENREF_6)] | Wrong study type (retrospective study) |
| Kashi 1994 [[7](#_ENREF_7)] | Wrong intervention |
| Lee 2007 [[8](#_ENREF_8)] | Wrong study type (retrospective study) |
| Mohammadi 2010 [[9](#_ENREF_9)] | Wrong intervention |
| Moreira 2007 [[10](#_ENREF_10)] | Wrong study type (retrospective study) |
| Pan 2008/2014 [[11](#_ENREF_11), [12](#_ENREF_12)] | Wrong study type (retrospective study) |
| Secin 2002 [[13](#_ENREF_13)] | Wrong study type (retrospective study) |
| Tzimas 2003 [[14](#_ENREF_14)] | Wrong study type (retrospective study) |
| Van Agt 2012 [[15](#_ENREF_15)] | No control group |
| Veale 2007 [[16](#_ENREF_16)] | Wrong study type (retrospective study) |

References for excluded studies:

1. Ameer A, Aljiffry M, Jamal M, Hassanain M, Doi S, Fernandez M, et al. Complications of ureterovesical anastomosis in adult renal transplantation: Comparison of the Lich-Gregoire and the Taguchi techniques. Ann Transpl. 2011 Jul-Sep;16(3):82-87.

2. Bessede T, Hammoudi Y, Bedretdinova D, Parier B, Francois H, Durrbach A, et al. Preoperative Risk Factors Associated With Urinary Complications After Kidney Transplantation. Transplantation Proceedings. 2017 Nov;49(9):2018-24.

3. Englesbe MJ, Dubay DA, Gillespie BW, Moyer AS, Pelletier SJ, Sung RS, et al. Risk factors for urinary complications after renal transplantation. American Journal of Transplantation. 2007 Jun;7(6):1536-41.

4. Gutierrez Banos JL, Portillo Martin JA, Correas Gomez MA, Monge Mirallas JM, Roca Edreira A. [Single-stitch extravesical ureteroneocystostomy in kidney transplantation (Taguchi's technic)]. [Spanish]. 1994 May;1(5):569-72.

5. Gutierrez Banos JL, Portillo Martin JA, Correas Gomez MA, Monge Mirallas JM, Roca Edreira A. [Extravesical ureteroneocystostomy in renal transplantation. Comparative study of the Campos Freire's and the Taguchi's techniques (single point)]. [Spanish]. 1994 May;1(4):393-8.

6. Hakim NS, Benedetti E, Pirenne J, Gillingham KJ, Payne WD, Dunn DL, et al. Complications of ureterovesical anastomosis in kidney transplant patients: the Minnesota experience. 1994 Dec;1(6):504-7.

7. Kashi SH, Wynne KS, Sadex SA, Lodge JP. Posttransplant bladder recovery--a prospective randomized trial of two techniques of ureteric anastomosis. Transplantation. 1994;57(10):1523‐25.

8. Lee RS, Bakthavatsalam R, Marsh CL, Kuhr CS. Ureteral complications in renal transplantation: A comparison of the Lich-Gregoir versus the Taguchi technique. Transplantation Proceedings. 2007 Jun;39(5):1461-64.

9. Mohammadi Fallah MR, Afshari AT, Estifayi K, Ghafari A, Sepehrvand N, Hatami S. Frequency of occurrence of vesico-ureteral reflux in kidney transplanted patients with the new technique of uretero-neo- cystostomy (Barry-Taguchi). 2010 Mar;1(2):232-6.

10. Moreira P, Parada B, Figueiredo A, Maia N, Nunes P, Bastos C, et al. Comparative study between two techniques of ureteroneocystostomy: Taguchi and Lich-Gregoir. Transplantation Proceedings. 2007 Oct;39(8):2480-82.

11. Pan X, Xue W, Tian P, Ding X, Yan H, Feng X, et al. Follow-up evaluation of a new ureteral anastomosis technique in renal transplantation. Zhongguo xiu fu chong jian wai ke za zhi [Chinese journal of reparative and reconstructive surgery]. 2008;22(8):998‐1002.

12. Pan XM, Xiang HL, Ding CG, Luo ZZ, Tian PX, Xue WJ. Comparative study of one-stitch versus Lich-Gregoir ureterovesical implantation for kidney transplants. World J Urol. 2014 Oct;32(5):1355-61.

13. Secin FP, Rovegno AR, Marrugat RE, Virasoro R, Lautersztein GA, Fernandez H. Comparing Taguchi and Lich-Gregoir ureterovesical reimplantation techniques for kidney transplants. 2002 Sep;1(3):926-30.

14. Tzimas GN, Hayati H, Tchervenkov JI, Metrakos PP. Ureteral implantation technique and urologic complications in adult kidney transplantion. Transplantation Proceedings. 2003 Nov;35(7):2420-22.

15. Van Agt S, Dugardin F, Sibert L, Caremel R, Grise P. Modification of the technique of anastomosis ureterovesical type Taguchi (one stitch) in renal transplantation. Prog Urol. 2012 Dec;22(4):F124-F30.

16. Veale JL, Yew J, Gjertson DW, Smith CV, Singer JS, Rosenthal JT, et al. Long-term comparative outcomes between 2 common ureteroneocystostomy techniques for renal transplantation. Journal of Urology. 2007 Feb;177(2):632-36.
